# Supplementary material for: Visible-Light-Driven BiOBr-TiO2-Attapulgite Photocatalyst with Excellent Photocatalytic Activity for Multiple Xanthates
Source: MDPI journal article supplement (doi:10.3390/catal13121504), 2023-12-10
Supplement: s1 [file s1]

## *Supplementary Materials*

### **Visible-light-driven BiOBr-TiO<sub>2</sub>-attapulgite photocatalyst with excellent photocatalytic activity for multiple xanthates**

Yaozhong Qi <sup>a</sup>, Sikai Zhao <sup>a \*</sup>, Xiaoyu Jiang <sup>a</sup>, Zhangke Kang <sup>a</sup>,

Shuling Gao <sup>a</sup>, Wengang Liu <sup>a</sup>, Yanbai Shen <sup>a \*</sup>

<sup>a</sup> School of Resources and Civil Engineering, Northeastern University, Shenyang 110819, China

\*Corresponding author.

E-mail: zhaosikai@mail.neu.edu.cn (S. Zhao), shenyanbai@mail.neu.edu.cn (Y. Shen).

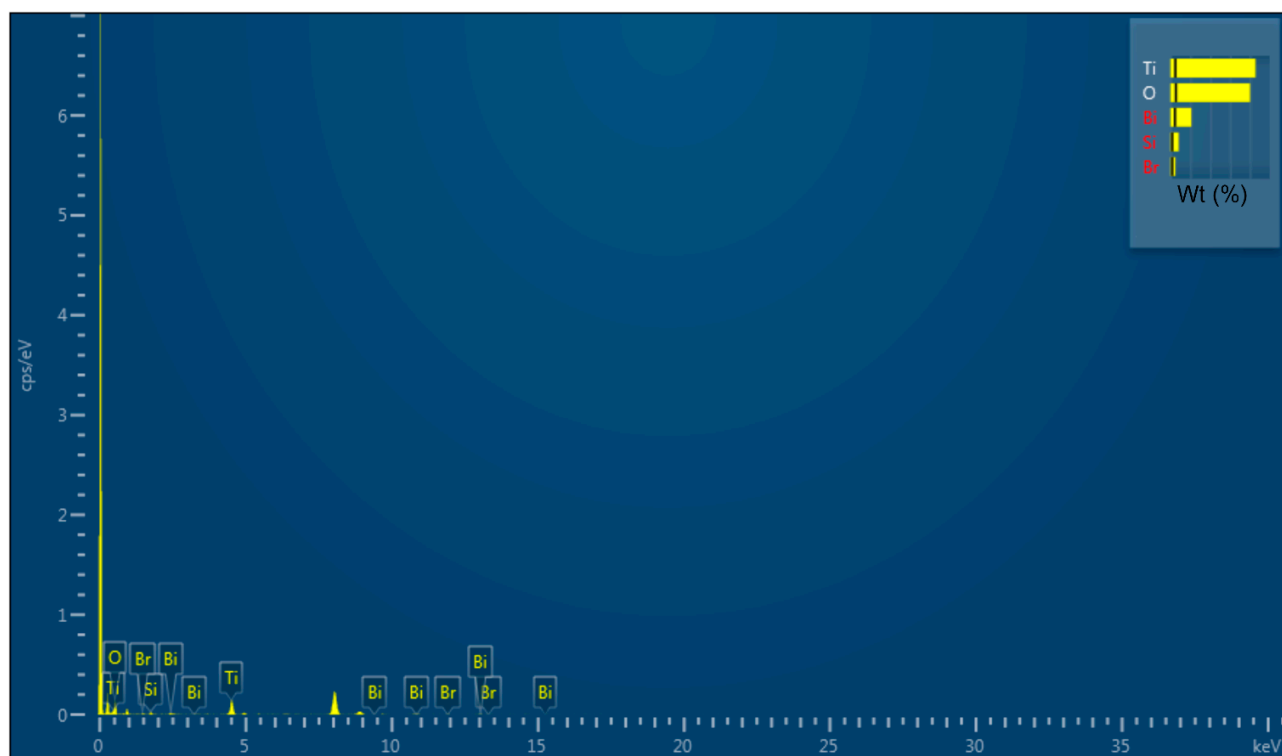

**Figure S1.** EDS spectra of BTA composites.

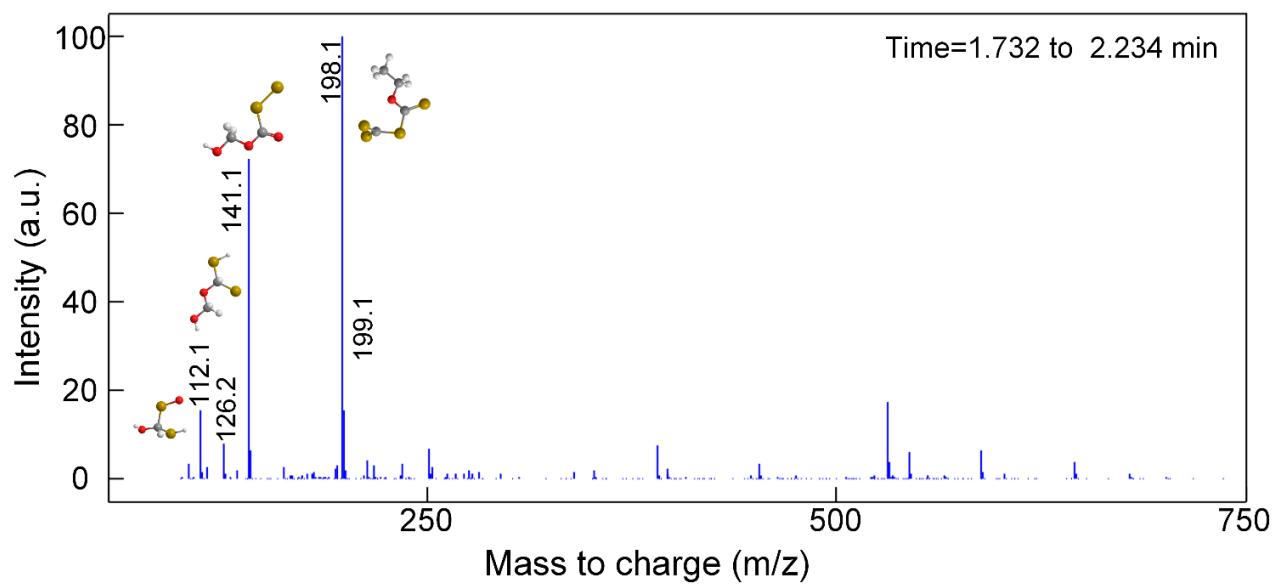

**Figure S2.** LC-MS pattern of SEX after a 5 min photocatalytic reaction.

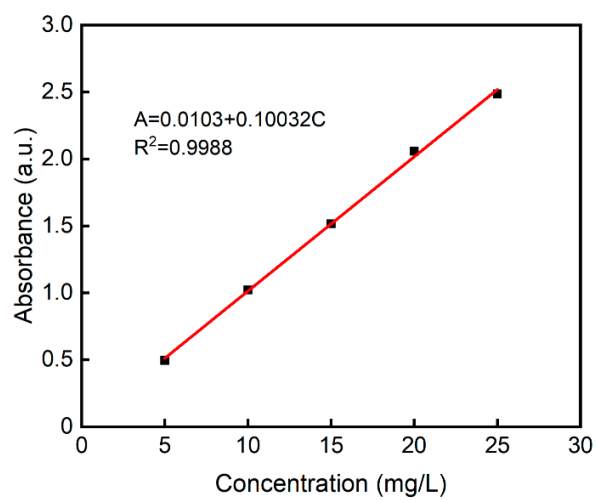

**Figure S3.** Absorbance standard curve of SEX solution.

**Table. S1** BET specific surface area of different composites.

| Sample | $S_{\text{BET}}$ (m <sup>2</sup> /g) |
|--------|--------------------------------------|
| BT     | 29.25                                |
| BTA    | 57.77                                |

**Table. S2** Chemical structures and m/z values of possible degradation intermediates of SEX.

| Substance                                    | Molecular structure                                                                | Molecular weight | m/z          |
|----------------------------------------------|------------------------------------------------------------------------------------|------------------|--------------|
| $\text{CH}_3\text{O}_2\text{S}_2^-$          | 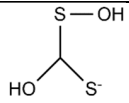  | 111              | 112.1        |
| $\text{C}_2\text{H}_5\text{O}_2\text{S}_2^-$ |   | 125              | 126.2        |
| $\text{C}_2\text{H}_5\text{O}_2\text{S}_2^-$ |   | 141              | 141.1        |
| $\text{C}_4\text{H}_5\text{OS}_4^-$          |  | 197              | 198.1& 199.1 |
